# Supplementary material
Source: MDPI journal article supplement (https://www.mdpi.com/1999-4907/13/6/951)
Supplement: s1 [file s1 › forests-1732593-supplementary.pdf]

# **Foliar Water Uptake Capacity in Six Mangrove Species**

Katrien H.D. Schaepdryver <sup>1\*</sup>, Willem Goossens <sup>1</sup>, Abdulla Naseef <sup>2</sup>, Sreejith Kalpuzha Ashtamoorthy <sup>2</sup>, Kathy Steppe <sup>1</sup>

<sup>1</sup>Laboratory of Plant Ecology, Department of Plants and Crops, Faculty of Bioscience Engineering, Ghent University, Coupure links 653, 9000 Ghent, Belgium

<sup>2</sup>Department of Forest Ecology, Kerala Forest Research Institute, 680653 Thrissur, Kerala, India

\*Correspondence to: Katrien Schaepdryver  
Laboratory of Plant Ecology, Ghent University  
Coupure links 653, B-9000 Ghent, Belgium  
Phone +32 9 264 61 14  
E-mail: katrien.schaepdryver@UGent.be; kathy.steppe@UGent.be

## Figure legends – Supplementary material

**Figure S1.** (a) Detail of the Ashtamudi Lake (Kerala, India) with the sample location of the five studied mangrove species indicated by a red circle with radius 500 m. Scale bar = 0.5 km. (b) Overview of the entire Ashtamudi Lake with the sample location indicated by a red circle. Scale bar = 2.5 km.

**Figure S2.** Difference in leaf water content ( $\Delta LWC$ ; %) of leaves of different mangrove species. Box plot midlines are medians, box edges show first and third quartiles with whiskers representing minimum and maximum values. Circles indicate outliers in the dataset. Letters at the top of box plots indicate significant ( $p < 0.05$ ) differences among groups based on Tukey's comparisons, for which data of  $\Delta LWC$  were log-transformed. Abbreviations: *A.c.* = *Aegiceras corniculatum*, *A.m.* = *Avicennia marina*, *B.c.* = *Bruguiera cylindrica*, *B.g.* = *Bruguiera gymnorhiza*, *S.a.* = *Sonneratia alba*, *S.c.* = *Sonneratia caseolaris*.

**Figure S3.** Results of the additional submersion experiment on leaves of *Avicennia marina*. Collected leaves were put in a ziplock bag containing exhaled air and moist paper tissue. After a period of one hour in the bag, water potential of 15 leaves was measured and FWU capacity was determined on 15 other leaves with the submersion experiment of Limm et al. [14]. The same was done with 30 leaves that had been in the bag for four hours. Parameters studied: (a) foliar water uptake (FWU) capacity, and (b) leaf water potential ( $\Psi_{\text{leaf}}$ ). Box plot midlines are medians, box edges show first and third quartiles with whiskers representing minimum and maximum values. Circles indicate outliers in the dataset. Letters at the top of box plots indicate

differences of significance ( $p < 0.05$ ) among groups, resulting from a Wilcoxon test for FWU capacity and from a t-test for water potential.

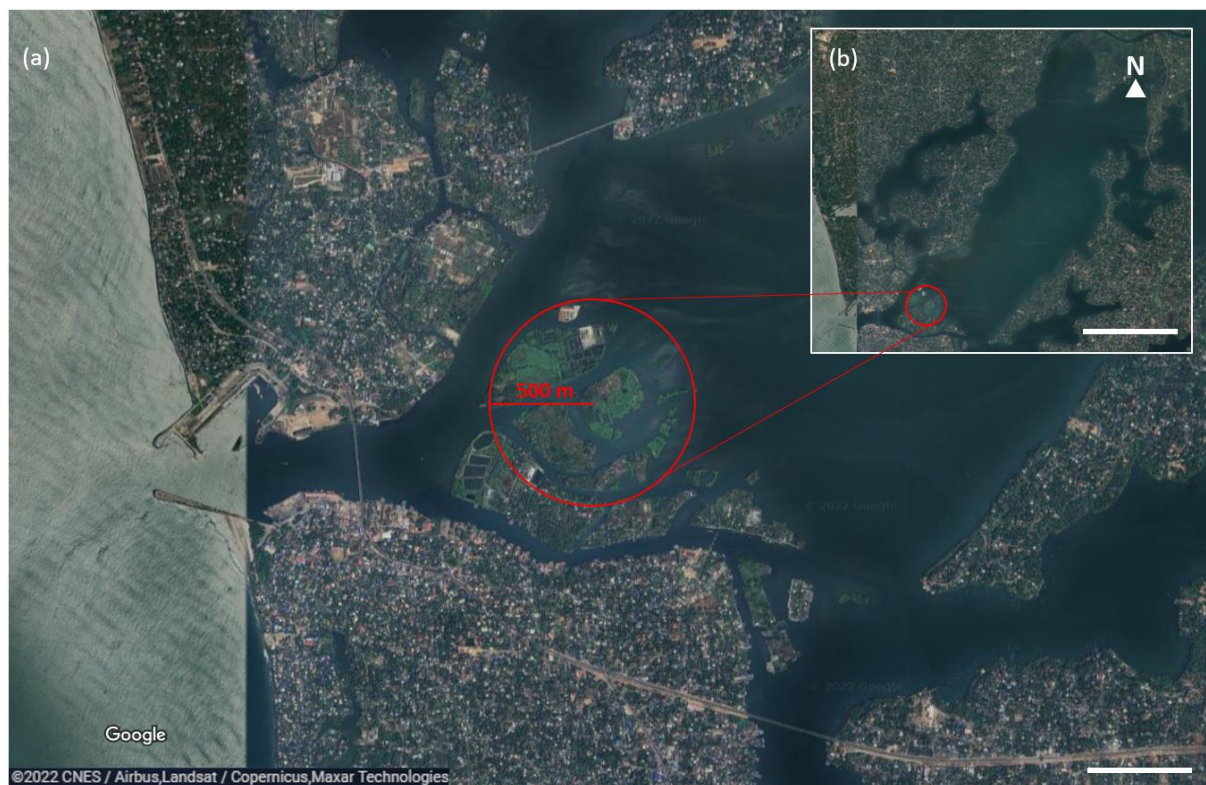

**Figure S1.** (a) Detail of the Ashtamudi Lake (Kerala, India) with the sample location of the five studied mangrove species indicated by a red circle with radius 500 m. Scale bar = 0.5 km. (b) Overview of the entire Ashtamudi Lake with the sample location indicated by a red circle. Scale bar = 2.5 km.

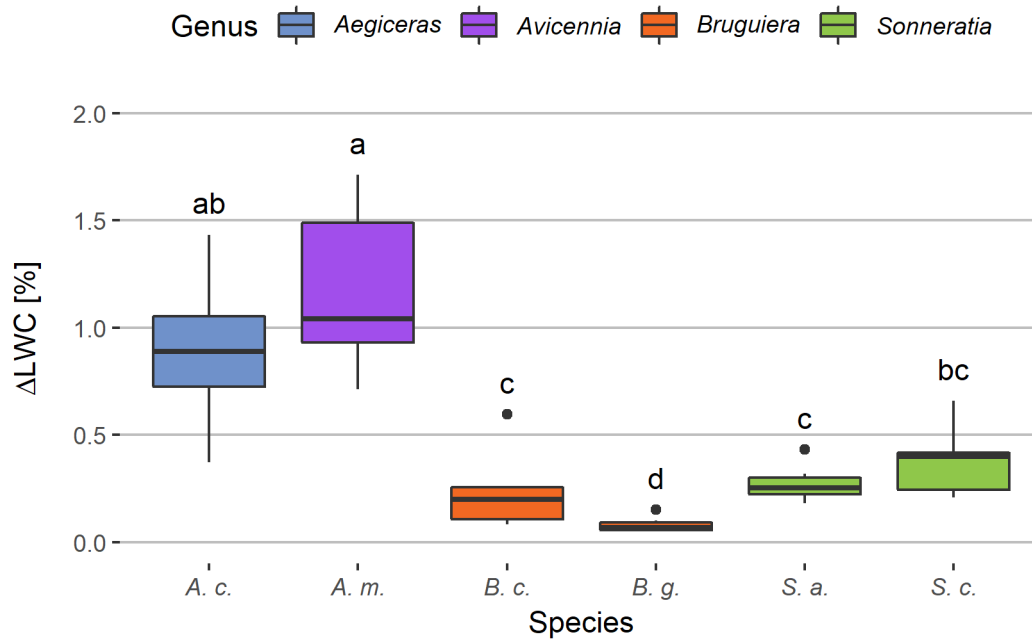

**Figure S2.** Difference in leaf water content ( $\Delta LWC$ ; %) of leaves of different mangrove species. Box plot midlines are medians, box edges show first and third quartiles with whiskers representing minimum and maximum values. Circles indicate outliers in the dataset. Letters at the top of box plots indicate significant ( $p < 0.05$ ) differences among groups based on Tukey's comparisons, for which data of  $\Delta LWC$  were log-transformed. Abbreviations: A.c. = *Aegiceras corniculatum*, A.m. = *Avicennia marina*, B.c. = *Bruguiera cylindrica*, B.g. = *Bruguiera gymnorrhiza*, S.a. = *Sonneratia alba*, S.c. = *Sonneratia caseolaris*.

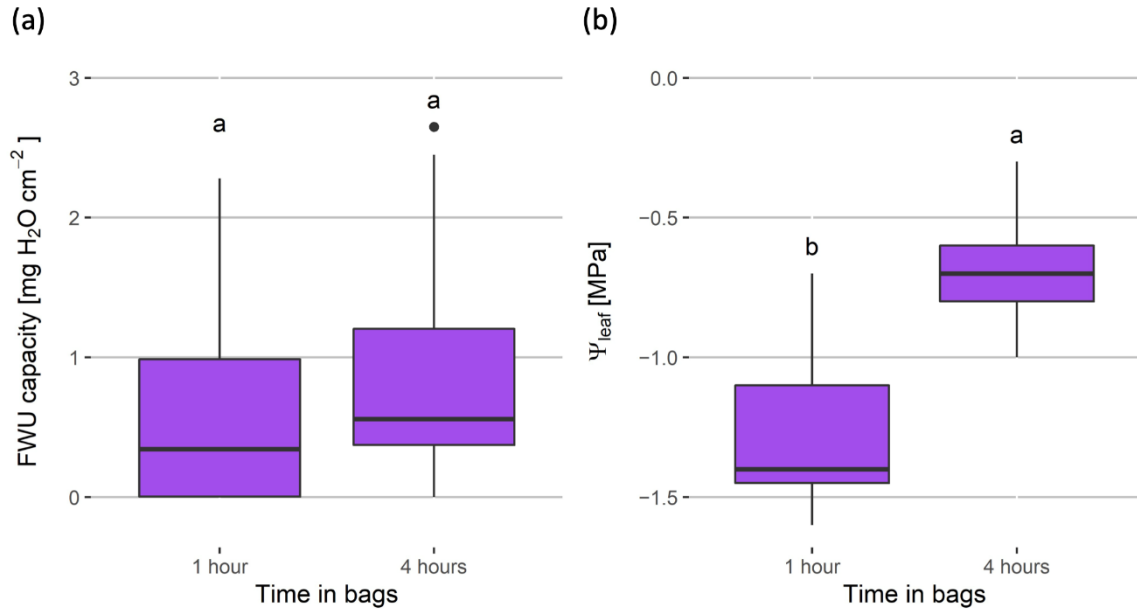

**Figure S3.** Results of the additional submersion experiment on leaves of *Avicennia marina*. Collected leaves were put in a ziplock bag containing exhaled air and moist paper tissue. After a period of one hour in the bag, water potential of 15 leaves was measured and FWU capacity was determined on 15 other leaves with the submersion experiment of Limm et al. [14]. The same was done with 30 leaves that had been in the bag for four hours. Parameters studied: **(a)** foliar water uptake (FWU) capacity, and **(b)** leaf water potential ( $\Psi_{\text{leaf}}$ ). Box plot midlines are medians, box edges show first and third quartiles with whiskers representing minimum and maximum values. Circles indicate outliers in the dataset. Letters at the top of box plots indicate differences of significance ( $p < 0.05$ ) among groups, resulting from a Wilcoxon test for FWU capacity and from a t-test for water potential.
